# Supplementary material for: Effectiveness of Pilates Training on Body Composition and Isokinetic Muscular Strength in Adolescent Baseball Players
Source: MDPI journal article supplement (doi:10.3390/ijerph191912085), 2022-09-24
Supplement: s1 [file s1]

**Table S1.** Change of leg and trunk lean mass following 8-week of Pilates training in adolescent baseball players

| Variable (kg)         | Pre          | Post           | <i>p</i> -value | Cohen's <i>d</i> effect size |
|-----------------------|--------------|----------------|-----------------|------------------------------|
| Right leg lean mass   | 10.28 ± 1.35 | 10.13 ± 1.47   | 0.1969          | 0.106                        |
| Left leg lean mass    | 10.26 ± 1.46 | 10.07 ± 1.24   | 0.1425          | 0.140                        |
| Right trunk lean mass | 12.18 ± 1.32 | 12.87 ± 1.33** | 0.0005          | 0.520                        |
| Left trunk lean mass  | 12.54 ± 1.34 | 13.22 ± 1.05** | 0.0003          | 0.569                        |
| Right total lean mass | 28.03 ± 2.98 | 28.52 ± 2.69** | 0.0006          | 0.172                        |
| Left total lean mass  | 27.94 ± 2.78 | 28.55 ± 2.55** | 0.0045          | 0.228                        |

Values are the mean ± SD., \*\**p* < 0.01 vs. pre-test. Effect size range: |0.20| ≤ small < |0.50| < medium < |0.80| ≤ large.

**Table S2.** Change of leg and trunk isokinetic strength following 8-week of Pilates training in adolescent baseball players

| Parameters                       | Pre            | Post           | <i>p</i> -value | Cohen's <i>d</i><br>effect size |
|----------------------------------|----------------|----------------|-----------------|---------------------------------|
| <b>Right knee flexion</b>        |                |                |                 |                                 |
| Peak torque (Nm)                 | 148.7 ± 42.2   | 151.4 ± 30.36  | 0.374           | 0.074                           |
| Work per repetition (Nm)         | 165.0 ± 52.0   | 172.9 ± 36.31  | 0.240           | 0.178                           |
| Average power per repetition (W) | 106.3 ± 32.05  | 110.3 ± 22.52  | 0.273           | 0.146                           |
| <b>Left knee flexion</b>         |                |                |                 |                                 |
| Peak torque (Nm)                 | 137.9 ± 31.15  | 144.2 ± 33.2   | 0.126           | 0.195                           |
| Work per repetition (Nm)         | 156.4 ± 40.93  | 167.1 ± 41.64* | 0.027           | 0.259                           |
| Average power per repetition (W) | 101.5 ± 23.2   | 107.9 ± 26.82  | 0.060           | 0.255                           |
| <b>Right knee extension</b>      |                |                |                 |                                 |
| Peak torque (Nm)                 | 244.9 ± 46.22  | 252.0 ± 33.73  | 0.243           | 0.177                           |
| Work per repetition (Nm)         | 271.7 ± 45.03  | 281.8 ± 33.83  | 0.149           | 0.256                           |
| Average power per repetition (W) | 174.2 ± 26.92  | 178.9 ± 20.28  | 0.230           | 0.199                           |
| <b>Left knee extension</b>       |                |                |                 |                                 |
| Peak torque (Nm)                 | 191.7 ± 32.55  | 199.4 ± 34.17  | 0.204           | 0.230                           |
| Work per repetition (Nm)         | 242.9 ± 43.86  | 260.4 ± 41.5*  | 0.031           | 0.409                           |
| Average power per repetition (W) | 155.7 ± 28.55  | 167.8 ± 27.00* | 0.023           | 0.435                           |
| <b>Trunk flexion</b>             |                |                |                 |                                 |
| Peak torque (Nm)                 | 233.8 ± 27.35  | 206.3 ± 39.34* | 0.043           | 0.811                           |
| Work per repetition (Nm)         | 756.3 ± 168.3  | 702.6 ± 93.75  | 0.171           | 0.394                           |
| Average power per repetition (W) | 88.5 ± 29.82   | 77.8 ± 10.12   | 0.122           | 0.480                           |
| <b>Trunk extension</b>           |                |                |                 |                                 |
| Peak torque (Nm)                 | 321.1 ± 37.58  | 327.6 ± 46.15  | 0.326           | 0.154                           |
| Work per repetition (Nm)         | 1150.0 ± 142.8 | 1213.0 ± 157.3 | 0.080           | 0.419                           |
| Average power per repetition (W) | 123.7 ± 15.94  | 135.7 ± 18.42* | 0.049           | 0.696                           |

Values are the mean ± SD., \**p* < 0.05 vs. pre-test. Effect size range: |0.20| ≤ small < |0.50| < medium < |0.80| ≤ large.
